# Supplementary material for: Association Study of a Functional Variant on ABCG2 Gene with Sunitinib-Induced Severe Adverse Drug Reaction
Source: PubMed Central journal article supplement (PMC4767438; doi:10.1371/journal.pone.0148177), 2016-02-25
Supplement: pone.0148177.s001.pdf [file pone.0148177.s001.pdf]

S1 Table: Association of ABCG2 421C>A,Q141K (rs2231142) with various sunitinib-induced adverse events after adjusting age, gender, ECOG performance and RCC histology

| Adverse event      | Multivariates |       |       |       |
|--------------------|---------------|-------|-------|-------|
|                    | P-value       | OR    | L95   | U95   |
| Increased AST/ALT  | 3.60E-02      | 2.307 | 1.056 | 5.039 |
| Diarrhea           | 2.80E-01      | 1.543 | 0.702 | 3.389 |
| Fever              | 1.98E-02      | 2.833 | 1.180 | 6.800 |
| Hand-foot syndrome | 3.74E-01      | 1.247 | 0.767 | 2.026 |
| Hypertension       | 3.55E-01      | 1.314 | 0.737 | 2.344 |
| Hypothyroidism     | 1.66E-01      | 1.400 | 0.870 | 2.252 |
| Leucopenia         | 4.88E-01      | 0.788 | 0.403 | 1.543 |
| Neutropenia        | 4.21E-01      | 0.798 | 0.460 | 1.383 |
| Proteinuria        | 4.11E-01      | 1.299 | 0.696 | 2.423 |
| Thrombocytopenia   | 1.02E-02      | 1.886 | 1.162 | 3.060 |

Association was examined by logistic regression analysis, multivariate analysis were performed after adjustment of clinical variables (age, gender, ECOG performance status and RCC histology). Analysis was performed with patients who developed adverse reaction of increased AST/ALT (grade 3 and 4 versus others), diarrhea (grade2 to 4 versus others), fever (grade2 to 4 versus others), hand-foot syndrome (grade2 to 4 versus others), hypertension (grade 3 and 4 versus others), hypothyroidism (grade2 to 4 versus others), leucopenia (grade 3 and 4 versus others), neutropenia (grade 3 and 4 versus others), proteinuria (grade2 to 4 versus others) and thrombocytopenia (grade 3 and 4 versus others). Abbreviations: OR, odds ratio; L95, lower bound of a 95% confidence interval; U95, upper bound of a 95% confidence interval.
